# Supplementary figures and images for: Fabrication and characterization of polymer–ceramic nanocomposites containing pluronic F127 immobilized on hydroxyapatite nanoparticles
Source: Royal Society of Chemistry journal article supplement (doi:10.1039/c6ra19499k), 2016-01-01

Supplementary Figure 1: TGA and dTG curves of PCL/P123, HA/PCL/P123 and HA-F127/PCL/P123

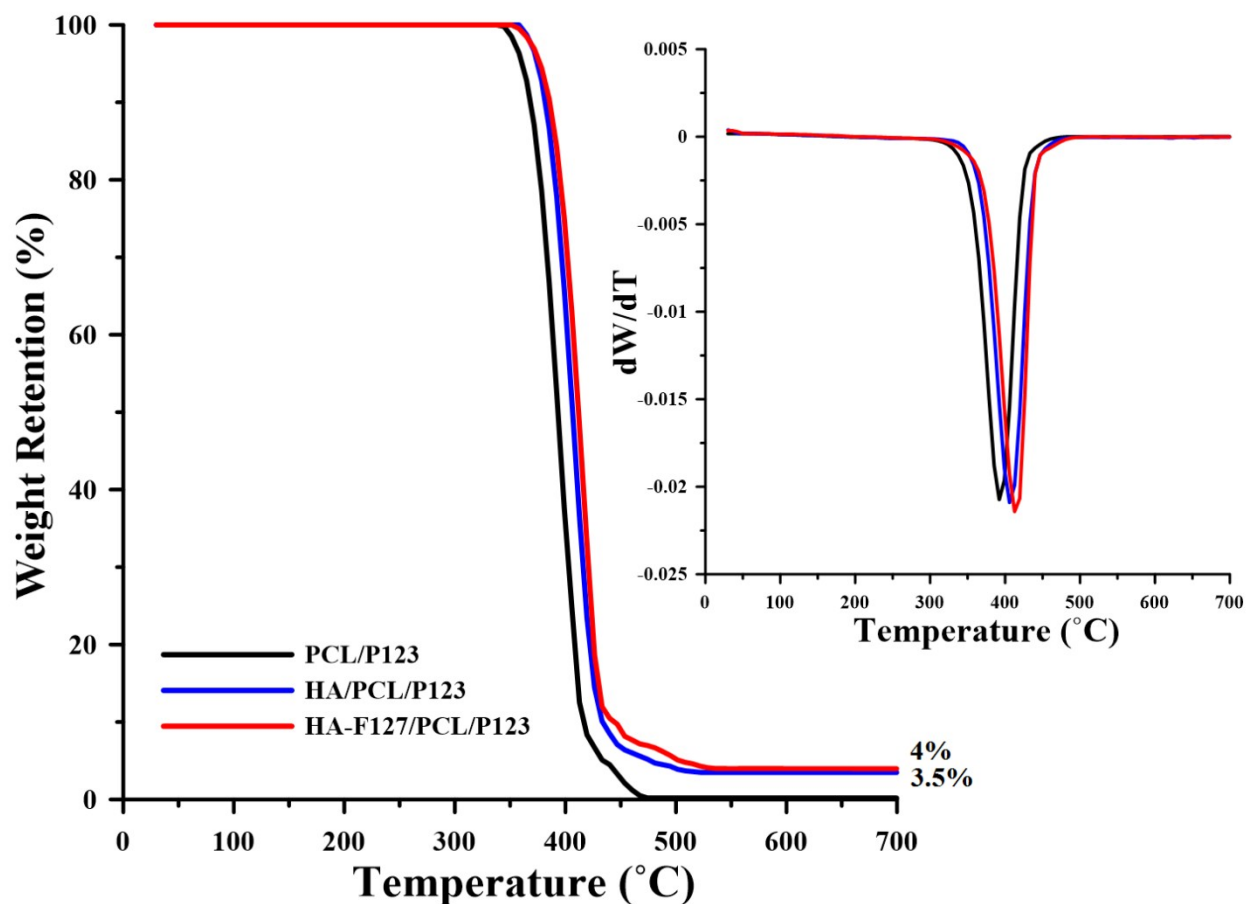

Supplement: c6ra19499k1.pdf [file c6ra19499k1.pdf]
